# Supplementary material for: Two-dimensional β-MoO3@C nanosheets as high-performance negative materials for supercapacitors with excellent cycling stability
Source: Royal Society of Chemistry journal article supplement (doi:10.1039/d0ra01258k), 2020-01-01
Supplement: d0ra01258k1.pdf [file d0ra01258k1.pdf]

Two-Dimensional  $\beta$ -MoO<sub>3</sub>@C nanosheets as high performance negative materials for  
supercapacitors with excellent cycling stability

Xuexia Liu, Ying Wu, Huiwen Wang, Yinfeng Wang, Chunfang Huang, Limin Liu\* and Zhijun  
Wang\*

School of Chemistry and Chemical Engineering, Jinggangshan University, Ji'an, Jiangxi 343009,  
PR China

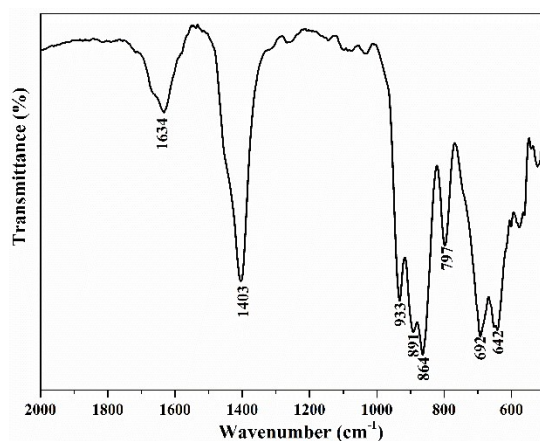

**Fig. S1** Fourier transform Infrared (FTIR) spectrum of yellow precursor

Fig. S1 presents the IR spectra of the yellow precursor. The band at  $1634\text{ cm}^{-1}$  is attributed to O-H stretching vibration of the crystal water. The band at  $1403\text{ cm}^{-1}$  is attributed to the bending vibration of O-H. The bands below  $1000\text{ cm}^{-1}$  are assigned to molybdate ion. The band at  $1415\text{ cm}^{-1}$  attributed to ammonium group is absence. Therefore, the yellow precursor is molybdenum acid monohydrate.

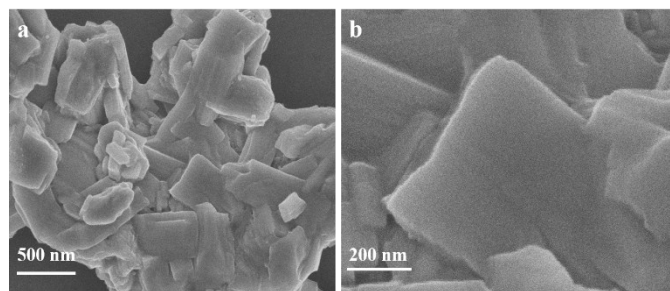

**Fig. S2** SEM images of the 2D  $\beta$ - $\text{MoO}_3$  nanosheets

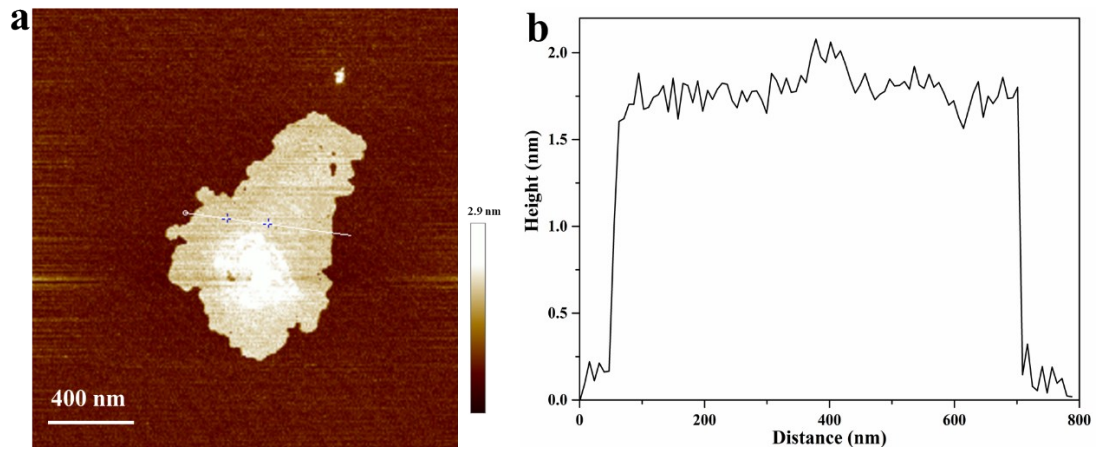

**Fig. S3** (a) AFM height image of 2D  $\beta$ -MoO<sub>3</sub>@C nanosheets and (b) the corresponding height profile along the crossed lines.

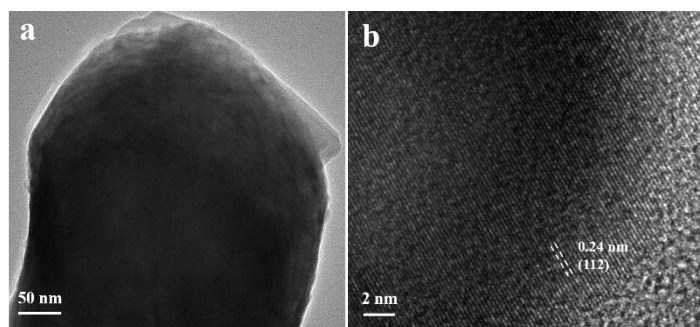

**Fig. S4** (a) TEM and (b) HRTEM images of 2D  $\beta$ -MoO<sub>3</sub> nanosheets

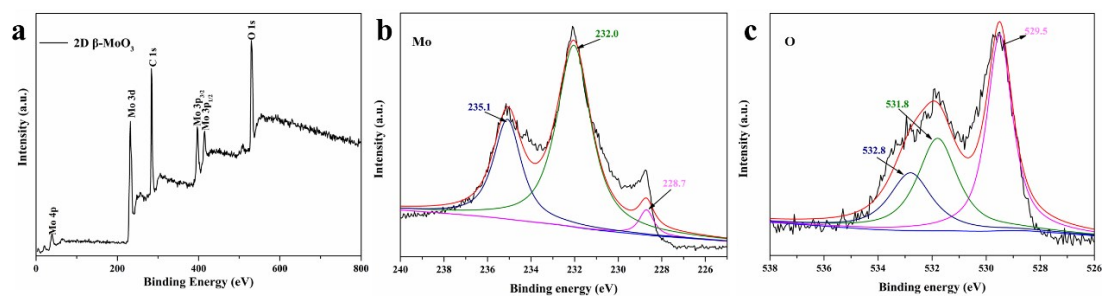

**Fig. S5** (a) XPS survey spectra of 2D  $\beta$ - $\text{MoO}_3$  nanosheets. High-resolution (b) Mo 3d and (c) O 1s spectra of the 2D  $\beta$ - $\text{MoO}_3$  nanosheets.

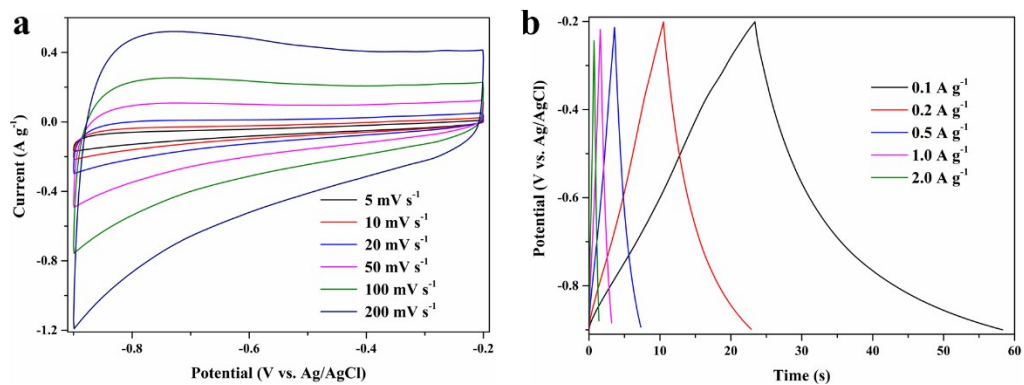

**Fig. S6** (a) CV curves at scan rates from 5 to 200  $\text{mV s}^{-1}$  and (b) Galvanostatic charge-discharge curves at various current density from 0.1 to 5.0  $\text{A g}^{-1}$  of 2D  $\beta$ - $\text{MoO}_3$  nanosheets in 1M KOH solution.

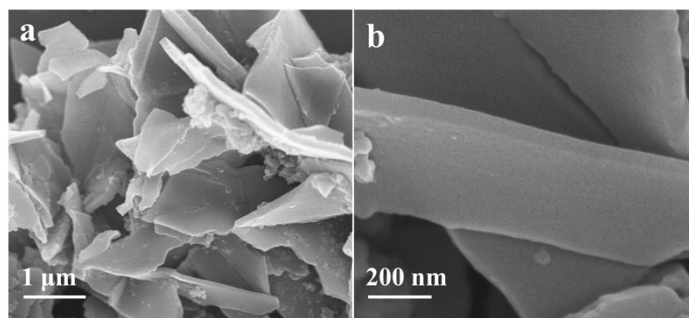

**Fig. S7** SEM images of 2D  $\beta$ - $\text{MoO}_3$  nanosheets after electrochemical stability test



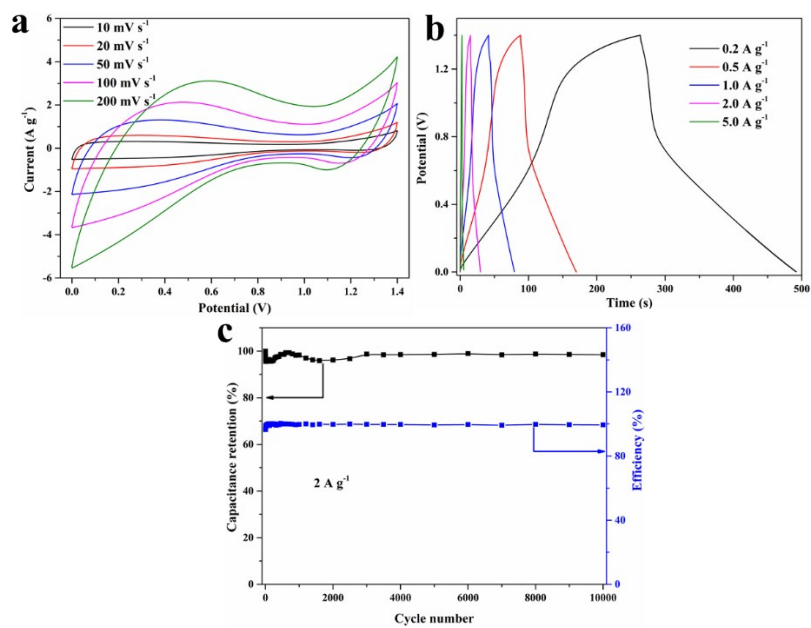

**Fig. S8** (a) CV at different scan rates, (b) GCD curves at different current densities and (c) Long cycle performance of the HSC.

**Table S1.** Comparison of the cycling stability performances of Mo based materials for supercapacitors

| Sample                                              | Stability tests        | Cycling stability   | Ref.             |
|-----------------------------------------------------|------------------------|---------------------|------------------|
| 2D $\beta$ -MoO <sub>3</sub> @C nanosheet           | 2 A g <sup>-1</sup>    | 94% (50000 cycles)  | <b>This work</b> |
| Polyaniline-h-MoO <sub>3</sub> hollow nanorods      | 50 mV s <sup>-1</sup>  | ~80% (5000 cycles)  | [1]              |
| MoO <sub>3</sub> /PPy/PANI composites               | 10 A g <sup>-1</sup>   | 86% (20000 cycles)  | [2]              |
| MoO <sub>3</sub> /C nanocomposites                  | 1 A g <sup>-1</sup>    | 86.5% (5000 cycles) | [3]              |
| 1T-MoS <sub>2</sub> /PANI nanosheets                | 10 A g <sup>-1</sup>   | 91% (2000 cycles)   | [4]              |
| MoO <sub>3</sub> /PANI nanobelts                    | 10 A g <sup>-1</sup>   | 76.7% (3000 cycles) | [5]              |
| Branchlike MoO <sub>3</sub> /PPy                    | 0.67 A g <sup>-1</sup> | 90% (200 cycles)    | [6]              |
| Tubular MoS <sub>2</sub> /PPy                       | 3 A g <sup>-1</sup>    | 82% (3000 cycles)   | [7]              |
| MoS <sub>2</sub> /PPy                               | 1 A g <sup>-1</sup>    | 85% (4000 cycles)   | [8]              |
| Tubular MoS <sub>2</sub> /PANI                      | 50 mV s <sup>-1</sup>  | 88% (1000 cycles)   | [9]              |
| Graphene decorated with MoS <sub>2</sub> nanosheets | 0.6 A g <sup>-1</sup>  | 89.6% (1000 cycles) | [10]             |
| rGO-MoS <sub>2</sub> 2D sheets                      | 1 A g <sup>-1</sup>    | 88% (1000 cycles)   | [11]             |
| MoS <sub>2</sub> -graphene hybrid films             | 2 A g <sup>-1</sup>    | 93% (1000 cycles)   | [12]             |

## References

- [1] V. Kumar, P.S. Lee, *J. Phys. Chem. C*, 2015, **119**, 9041-9049.
- [2] Y. Liu, L. Li, J.x. Zhu, J.S. Xu, S.L. Liu, Y.F. Wang, C. Zhang, T.X. Liu, *J. Mater. Chem. A*, 2018, **6**, 13428-13437.
- [3] N.N. Chen, L. Ni, J.H. Zhou, G.Y. Zhu, Y. Zhang, S.Y. Chen, F.J. Gao, C.L. Lu,

- H.M. Ji, J. Chen, X.Z. Wang, X.F. Guo, L.M. Peng, W.P. Ding, W.H. Hou, *Sustain. Energ. Fuels*, 2018, **2**, 2788-2798.
- [4] C.Y. Zhao, J.M. Ang, Z.L. Liu, X.H. Lu, *Chem. Eng. J.*, 2017, **330**, 462-469.
- [5] B. You, J.H. Jiang, S.J. Fan, *ACS Appl. Mater. Interfaces*, 2014, **6**, 15302-15308.
- [6] X. Zhang, X.Z. Zeng, M. Yang, Y.X. Qi, *ACS Appl. Mater. Interfaces*, 2014, **6**, 1125-1130.
- [7] Y.X. Chen, W.J. Ma, K.F. Cai, X.W. Yang, C.J. Huang, *Electrochim. Acta*, 2017, **246**, 615-624.
- [8] H.J. Tang, J.Y. Wang, H.J. Yin, H.J. Zhao, D. Wang, Z.Y. Tang, *Adv. Mater.*, 2015, **27**, 1117-1123.
- [9] L.J. Ren, G.N. Zhang, Z. Yan, L.P. Kang, H. Xu, F. Shi, Z.B. Lei, Z.H. Liu, *ACS Appl. Mater. Interfaces*, 2015, **7**, 28294-28302.
- [10] R. Thangappan, S. Kalaiselvam, A. Elayaperumal, R. Jayavel, M. Arivanandhan, R. Karthikeyan, Y. Hayakawa, *Dalton T.*, 2016, **45**, 2637-2646.
- [11] S.P. Jose, C.S. Tiwary, S. Kosolwattana, P. Raghavan, L.D. Machado, C. Gautam, T. Prasankumar, J. Joyner, S. Ozden, D.S. Galvao, P.M. Ajayan, *RSC Adv.*, 2016, **6**, 93384-93393.
- [12] S. Patil, A. Harle, S. Sathaye, K. Patil, *CrystEngComm*, 2014, **16**, 10845-10855.
